# Supplementary material
Source: PubMed Central journal article supplement (PMC4684964)
Supplement: NIHMS734563-supplement-1.pdf [file NIHMS734563-supplement-1.pdf]

**Figure S1** Effect of gating strategies on estimates of splenic B cell populations

(A) Mature splenic B cells in 8 wks old test panel mice as in Figure 3. (B) Mature splenic B cells in the same mice gated based on their expression of CD21 and IgM; the difference in relative frequencies of FOB cells and “new” B cells in B6.TCR-V $\gamma$ 1<sup>-/-</sup> mice is related to the CD23-deficiency in this strain. (C) IgD and CD23 expression profiles in splenic FOB cells and “new” B cells in the test panel mice; both cell types express CD23 at much reduced levels in B6.TCR-V $\gamma$ 1<sup>-/-</sup> mice, and at slightly increased levels in B6.TCR-V $\gamma$ 4<sup>-/-</sup>/V $\gamma$ 6<sup>-/-</sup> mice. Minor changes in the expression of IgD are also seen. (D, E) Relative frequencies and absolute numbers of mature splenic B cells based on the gating strategies shown in (A) and (B). The largest differences between the two types of measurement are seen with FOB cells and “new” B cells in B6.TCR-V $\gamma$ 1<sup>-/-</sup> mice (outlined in red). n=8 mice per group, \*P<0.05, \*\*\*P<0.001

# Supplemental Figure 2

**A** 10 days after adoptive transfer

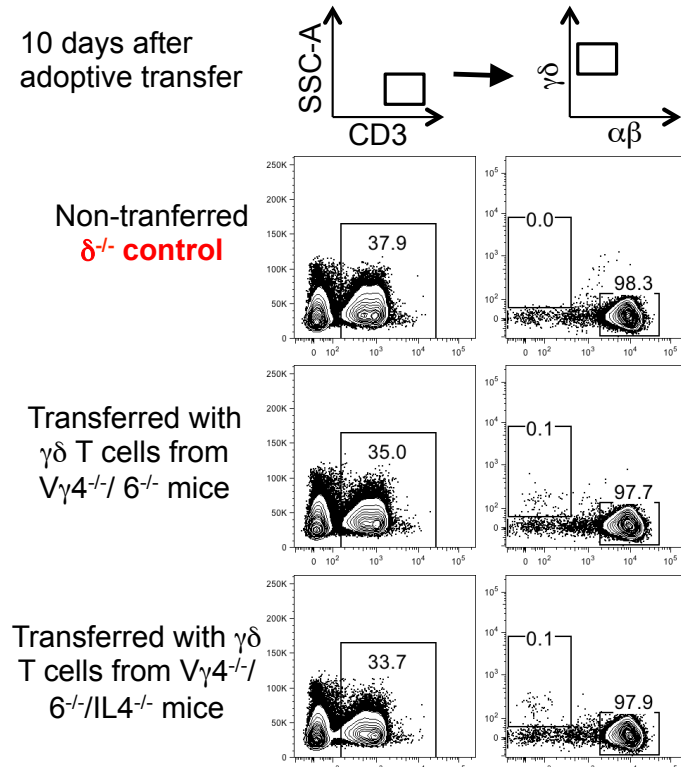

**B** 10 days after adoptive transfer

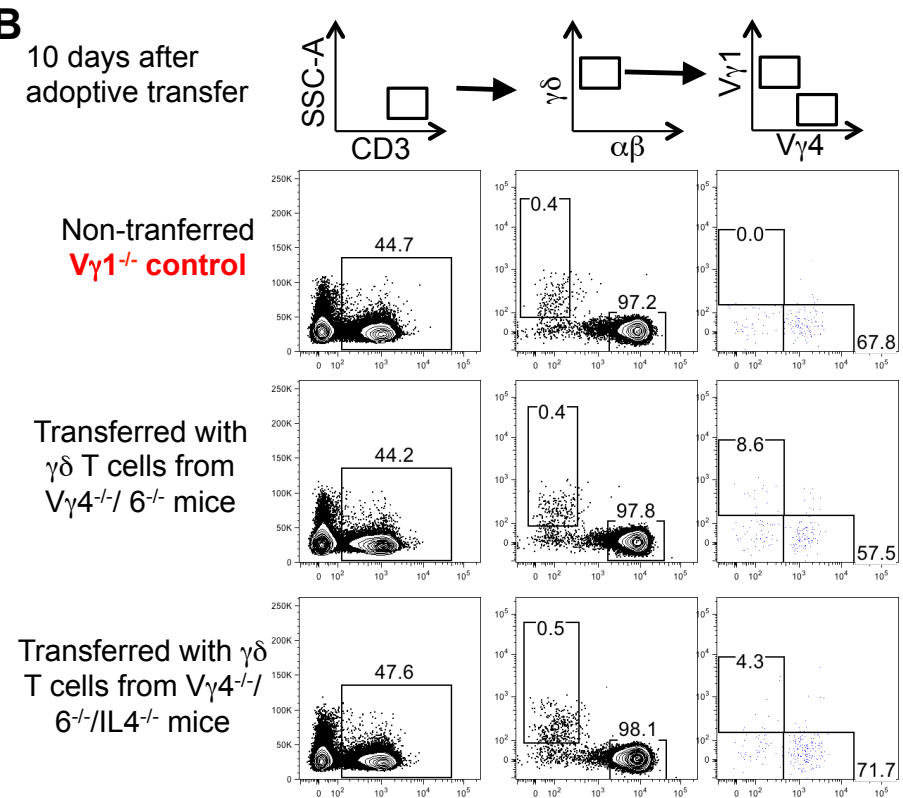

**C** Non-transferred  $V\gamma 1^{-/-}$  control

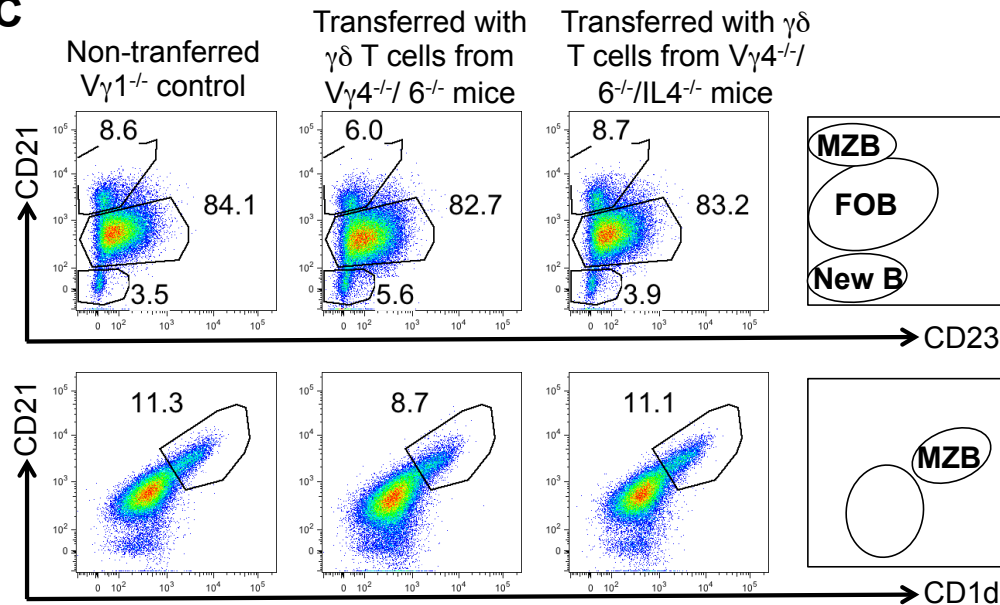

**D**

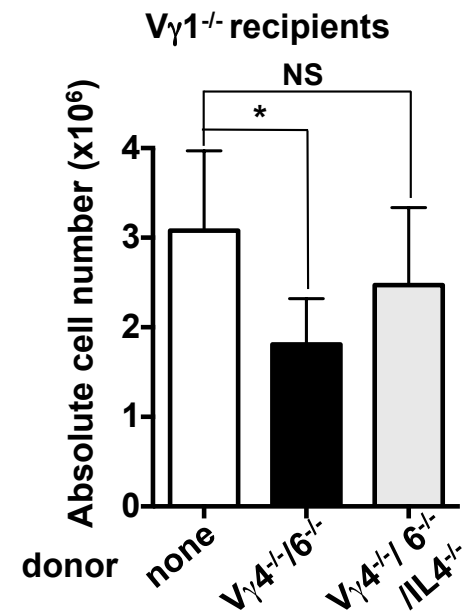

**Figure S2** Reconstituting effect of transfer with  $\gamma\delta$  T cells on splenic  $\gamma\delta$  T cell populations, and effect of transferred residual  $\gamma\delta$  T cells from B6.TCR-V $\gamma$ 4<sup>-/-</sup>/6<sup>-/-</sup> mice on splenic B cells in B6.TCR-V $\gamma$ 1<sup>-/-</sup> mice.

(A) 4 wks old female B6.TCR- $\delta$ <sup>-/-</sup> ( $\delta$ <sup>-/-</sup>) mice were transferred with  $5 \times 10^6$  purified splenic  $\gamma\delta$  T cells from B6.TCR-V $\gamma$ 4<sup>-/-</sup>/V $\gamma$ 6<sup>-/-</sup> mice (V $\gamma$ 4<sup>-/-</sup>/6<sup>-/-</sup>) or B6.TCR-V $\gamma$ 4<sup>-/-</sup>/V $\gamma$ 6<sup>-/-</sup>/IL-4<sup>-/-</sup> mice (V $\gamma$ 4<sup>-/-</sup>/6<sup>-/-</sup>/IL-4<sup>-/-</sup>), and examined 10 days later for the presence of  $\gamma\delta$  T cells in the spleen. Levels of reconstitution remained below 10% of normal  $\gamma\delta$  T cell numbers in the spleen.

(B) 4 wks old female B6.TCR-V $\gamma$ 1<sup>-/-</sup> (V $\gamma$ 1<sup>-/-</sup>) mice were transferred with purified splenic  $\gamma\delta$  T cells from B6.TCR-V $\gamma$ 4<sup>-/-</sup>/V $\gamma$ 6<sup>-/-</sup> mice (V $\gamma$ 4<sup>-/-</sup>/6<sup>-/-</sup>) or B6.TCR-V $\gamma$ 4<sup>-/-</sup>/V $\gamma$ 6<sup>-/-</sup>/IL-4<sup>-/-</sup> mice (V $\gamma$ 4<sup>-/-</sup>/6<sup>-/-</sup>/IL-4<sup>-/-</sup>), and examined 10 days later for the presence of V $\gamma$ 1<sup>pos</sup>  $\gamma\delta$  T cells in the spleen. Levels of reconstitution also remained well below normal  $\gamma\delta$  T cell numbers in the spleen.

(C) B6.TCR-V $\gamma$ 1<sup>-/-</sup> mice were transferred with purified splenic  $\gamma\delta$  T cells from B6.TCR-V $\gamma$ 4<sup>-/-</sup>/V $\gamma$ 6<sup>-/-</sup> (V $\gamma$ 4<sup>-/-</sup>/6<sup>-/-</sup>) or B6.TCR-V $\gamma$ 4<sup>-/-</sup>/V $\gamma$ 6<sup>-/-</sup>/IL-4<sup>-/-</sup> (V $\gamma$ 4<sup>-/-</sup>/6<sup>-/-</sup>/IL-4<sup>-/-</sup>) mice. 10 days after the transfer, B cell populations in the spleen were compared as detailed for Figure 3, using the indicated markers. Data of one representative experiment are shown.

(D) Effect of transferred residual  $\gamma\delta$  T cells on absolute numbers of MZB cells in the spleen of B6.TCR-V $\gamma$ 1<sup>-/-</sup> mice. n= 4 mice per group, \*P<0.05

# Supplemental Figure 3

**A**

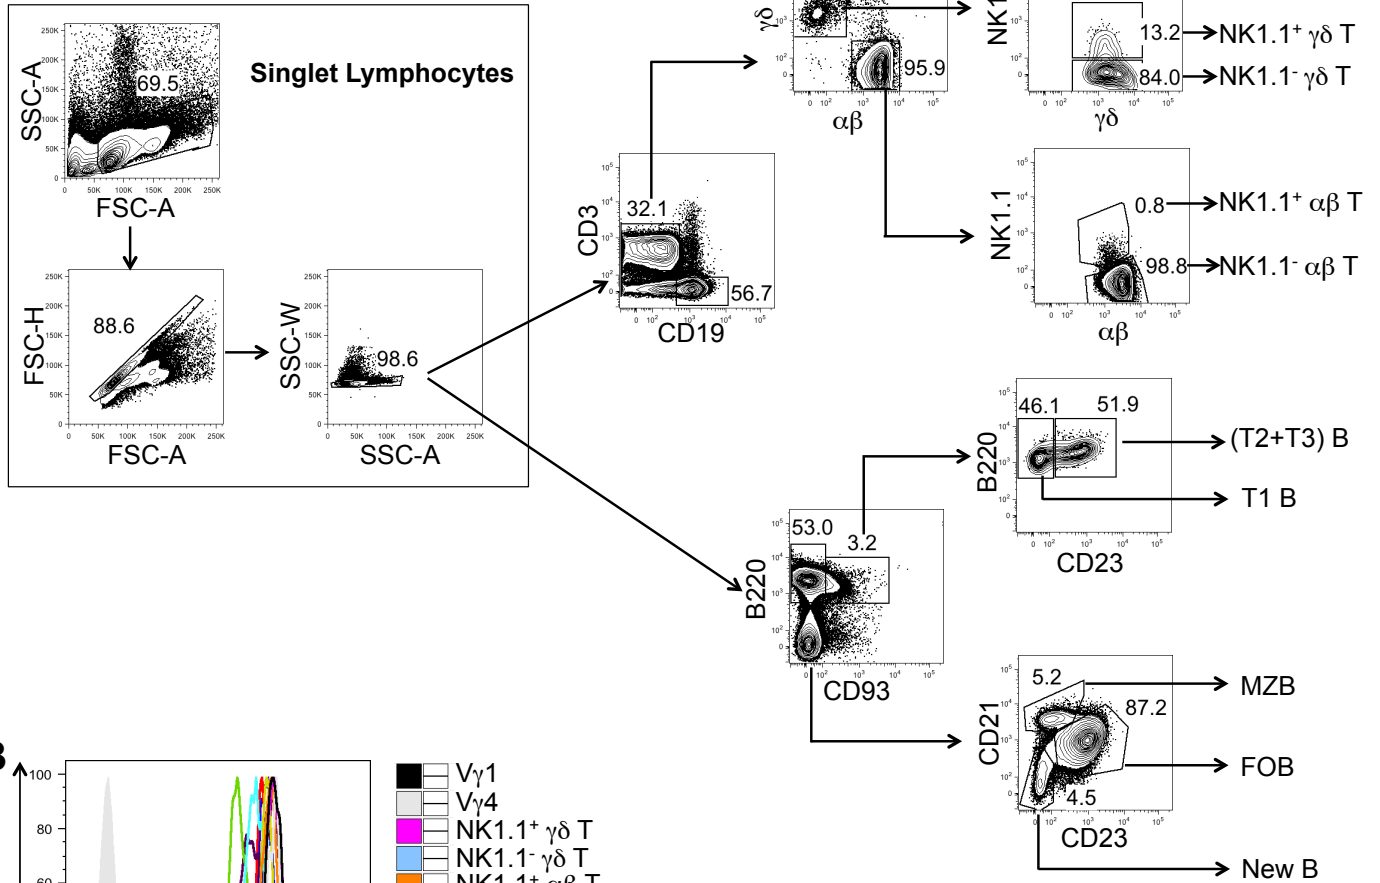

**B**

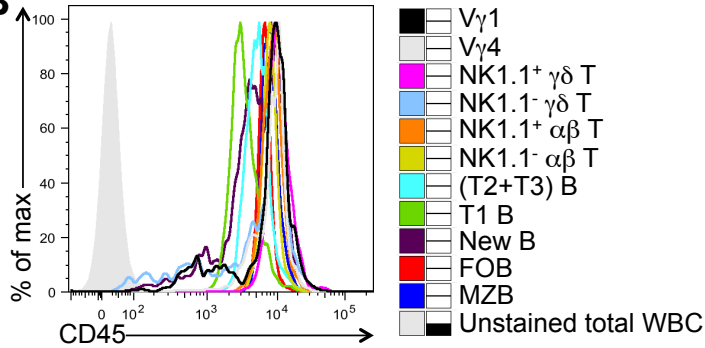

### Figure S3

(A) Gating strategy for the *in vivo* stained C57BL/6 splenic lymphocyte populations shown in Figure 7.

(B) CD45 expression of the splenic lymphocyte populations shown in Figure 7a.

C57BL/6 splenocytes were stained *in vitro* with specific mAbs detecting the indicated lymphocyte subsets, and compared for CD45 cell surface expression using cytofluorimetry.

# Supplemental Figure 4

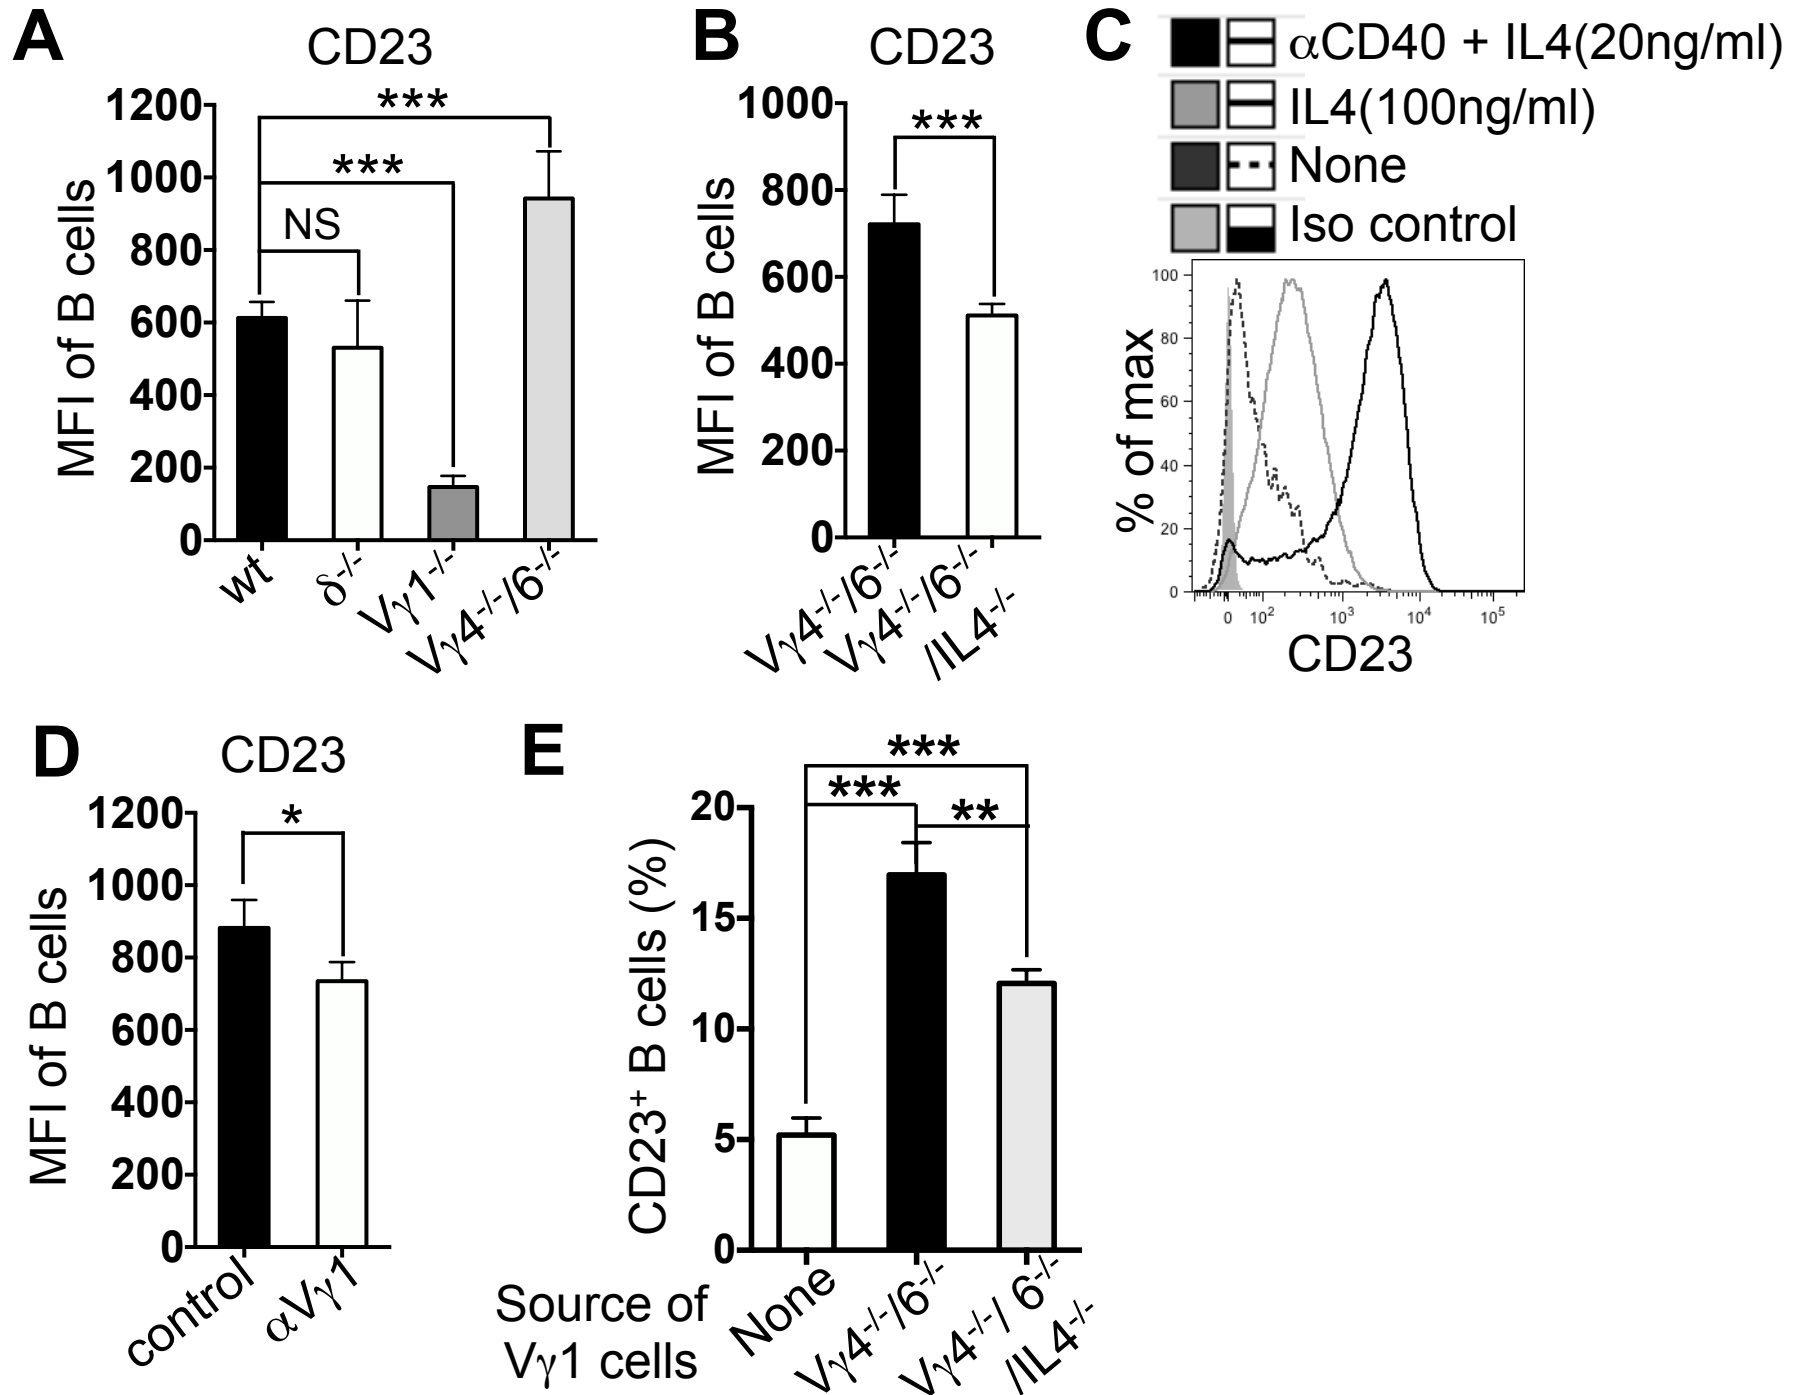

**Figure S4** Effect of IL-4 on CD23 expression by B cells of B6.TCR-V $\gamma$ 1<sup>-/-</sup> mice.

(A) Comparison of CD23 expression (MFI) among total splenic B cells from C57BL/6 (wt), B6.TCR- $\delta$ <sup>-/-</sup> ( $\delta$ <sup>-/-</sup>), B6.TCR-V $\gamma$ 1<sup>-/-</sup> (V $\gamma$ 1<sup>-/-</sup>) and B6.TCR-V $\gamma$ 4<sup>-/-</sup>/6<sup>-/-</sup> (V $\gamma$ 4<sup>-/-</sup>/6<sup>-/-</sup>) mice.

(B) Comparison of CD23 expression (MFI) among total splenic B cells from B6.TCR-V $\gamma$ 4<sup>-/-</sup>/6<sup>-/-</sup> (V $\gamma$ 4<sup>-/-</sup>/6<sup>-/-</sup>) and B6.TCR-V $\gamma$ 4<sup>-/-</sup>/6<sup>-/-</sup>/IL-4<sup>-/-</sup> (V $\gamma$ 4<sup>-/-</sup>/6<sup>-/-</sup>/IL-4<sup>-/-</sup>) mice.

Panels A and B: n = 5 mice per group, \*\*\*P<0.001

(C) IL-4 alone or in combination with anti CD40 antibody restores CD23 expression on splenic B cells derived from B6.TCR-V $\gamma$ 1<sup>-/-</sup> (V $\gamma$ 1<sup>-/-</sup>) mice. CD43-negative MZ B cell-rich splenic B cells from B6.TCR-V $\gamma$ 1<sup>-/-</sup> (V $\gamma$ 1<sup>-/-</sup>) mice were cultured for 60 hrs alone or in the presence of IL-4 or IL-4 plus anti CD40 mAb. B cells were subsequently stained for CD23. Prior to the treatment, B cells of these mice expressed CD23 at lower levels than wt B cells. Data shown are representative of several similar experiments.
